# Supplementary material for: Multifunctional nanoparticles for rapid bacterial capture, detection, and decontamination
Source: Royal Society of Chemistry journal article supplement (doi:10.1039/c2ra22286h), 2012-12-11
Supplement: c2ra22286h.pdf [file c2ra22286h.pdf]

## Supplementary material

# Multifunctional Nanoparticles for Rapid Bacterial Capture, Detection, and Decontamination

Longyan Chen <sup>a</sup>, Fereidoon S. Razavi <sup>b</sup>, Abdul Mumin <sup>a</sup>, Xiaoxuan Guo <sup>c</sup>, Tsun-Kong Sham <sup>c</sup>,  
and Jin Zhang <sup>a,\*</sup>

### 1. XRD measure

Powder X-ray diffraction (XRD) measurement was performed at room temperature with a Rigaku Toraflex RTP 300 (45 kV, 160 mA) using Co K $\alpha$  ( $\lambda = 1.790260 \text{ \AA}$ ) radiation. The scan range ( $2\theta$ ) was from  $13^\circ$  to  $70^\circ$  with a step width of  $0.02^\circ 2\theta$  as shown in Fig S-1

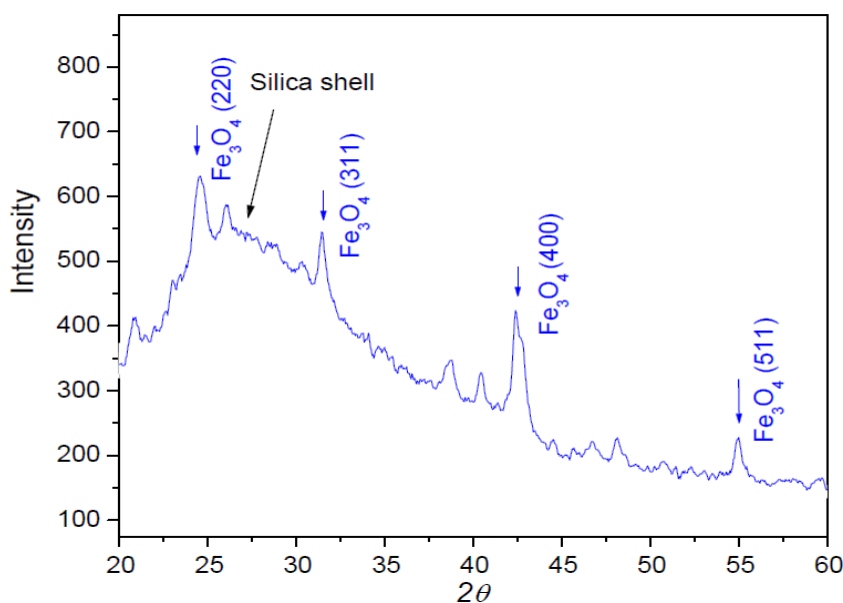

Figure S-1. XRD profile of FMNPs.

### 2. Magnetic saturation of FMNPs

The produced FMNPs were measured by superconducting quantum interference devices (SQUIDs) under a field of 60K Oe at room temperature. The saturated magnetization is approaching to 40 emu/g as shown in the Fig. S-2.

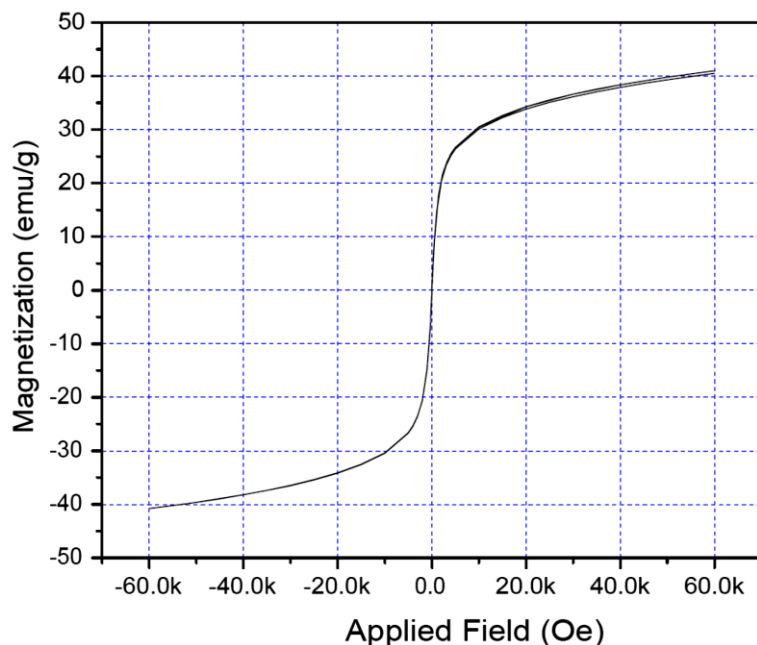

Figure S-2. Hysteresis loop of FMNPs measured at room temperature with magnetic field of 60K Oe.

For the core-shell structure of FMNPs, the average diameter of iron oxide core is estimated at  $50\pm 8$  nm, while the thickness of silica shell is about  $10\pm 5$  nm. The mean particle size is approximately  $65\pm 8$  nm. Therefore, it is 46% in volume ratio can contribute to the magnetic properties of FMNPs. It is noted that the densities of  $\text{SiO}_2$  NPs,  $\text{Fe}_3\text{O}_4$  NPs, and  $\text{Fe}_2\text{O}_3$  NPs are  $2.65 \text{ g/cm}^3$ ,  $4.95 \text{ g/cm}^3$ , and  $5.2 \text{ g/cm}^3$ , respectively. Assuming the magnetic core was  $\text{Fe}_2\text{O}_3$ , it is estimated that  $\sim 62.5$  wt% of the FMNPs contribute to the magnetic properties. Assuming the magnetic core are pure  $\text{Fe}_3\text{O}_4$ , it is estimated that  $\sim 61.2$  wt% of the FMNPs contributes to the magnetic properties. Our calculation indicates that the saturated magnetization is about 65.4 emu/g. It is noted that the  $M_s$  of pure magnetite  $\text{Fe}_3\text{O}_4$  is about 65 emu/g, which is 2.5 times of  $\text{Fe}_2\text{O}_3$  NPs [1]. Consequently, the core of FMNPs is made of  $\text{Fe}_3\text{O}_4$ , which is also confirmed by the results of X-ray absorption near edge structure spectroscopy (XANES) as discussed in our manuscript.

### 3. Determine the concentration of gentamicin on the FMNPs

To determine the amount of Gm conjugated on FMNPs, o-phthalaldehyde (OPA) is labeled with Gm as discussed in previous reports [2-3]. The amount of Gm conjugated on FMNPs was labeled

*L Chen, et al. FMNPs for rapid bacterial capture, detection, and decontamination*

with o-phthalaldehyde (opa) which has the fluorescent emission at 450 nm, and absorption at 292 nm. The optical signals vs. the concentration ( $\mu\text{g/mL}$ ) of OPA is as shown in Fig. S-2.

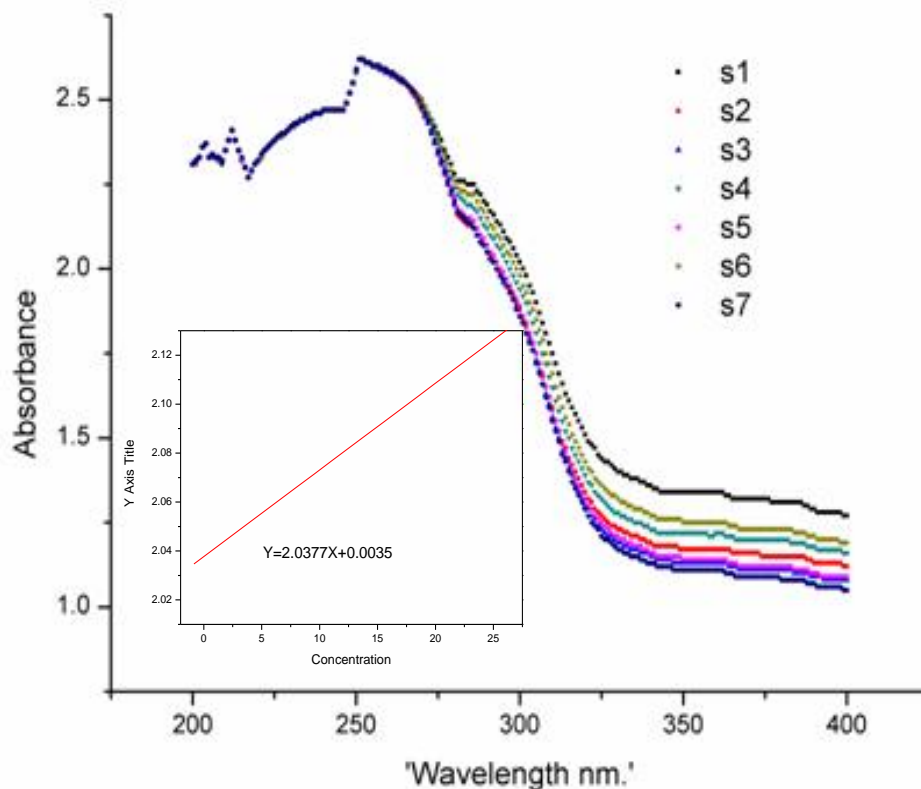

Figure S-3. UV-vis spectra of o-phthalaldehyde (OPA) with different concentration.

Table S-1. Absorption values at 292 nm of OPA-labeled Gm-FMNPs.

| UV Absorption | OPA labeled Gm-FMNPs<br>(fresh sample, 0.5 mg/mL) | OPA labeled Gm-FMNPs<br>(sored for two months, 0.5<br>mg/mL) |
|---------------|---------------------------------------------------|--------------------------------------------------------------|
| I (em)        | 2.44                                              | 2.15                                                         |

The products were washed several times followed by the 1 min ultrasound bath at room temperature to make sure that there is no free OPA in the final products. Our results indicate that 40  $\mu\text{g}$  of Gm can be conjugated onto 0.5mg FMNPs, that is, there is about 8  $\mu\text{g}$  of Gm

*L Chen, et al. FMNPs for rapid bacterial capture, detection, and decontamination*

conjugated onto 0.1 mg FMNPs. The decrease of absorption intensity after storing for 2 months is caused by the decay of the OPA with time.

## References

- [1] Clauter DA and Schmidt VA. Shifts in blocking temperature spectra for magnetite powders as a function of grain size and applied magnetic field. *Phys. Earth & Planetary* 1981;26: 81-92.
- [2] Al-Amoud AI, Clark BJ, and Chrystyn H, Determination of gentamicin in urine samples after inhalation by reversed-phase high-performance liquid chromatography using pre-column derivatisation with o-phthalaldehyde. *J Chromatogr B* 2002;769: 89–95.
- [3] Ramos Fernández JM, García Campaña AM, Alés Barrero F, and Bosque Sendra JM. Determination of gentamicin in pharmaceutical formulations using peroxyoxalate chemiluminescent detection in flow-injection analysis. *Talanta* 2006;69: 763–768.
